# Supplementary material for: Adsorption mechanism of NH3, NO, and O2 molecules over the FexOy/AC catalyst surface: a DFT-D3 study
Source: Royal Society of Chemistry journal article supplement (doi:10.1039/d0nj05628f), 2021-01-01
Supplement: d0nj05628f1.pdf [file d0nj05628f1.pdf]

## Adsorption mechanism of $\text{NH}_3$ , $\text{NO}$ , and $\text{O}_2$ molecules over $\text{Fe}_x\text{O}_y/\text{AC}$ catalyst surface: a DFT-D3 study

Chaoyue Xie<sup>a</sup>, Yunlan Sun<sup>a\*</sup>, Baozhong Zhu<sup>a\*</sup>, Weiyi Song<sup>a</sup>, Minggao Xu<sup>b</sup>

<sup>a</sup> School of Petroleum Engineering, Changzhou University, Changzhou, Jiangsu 213164, China

<sup>b</sup> Center for Advanced Combustion and Energy, University of Science and Technology of China,  
Hefei, Anhui 230026, PR China

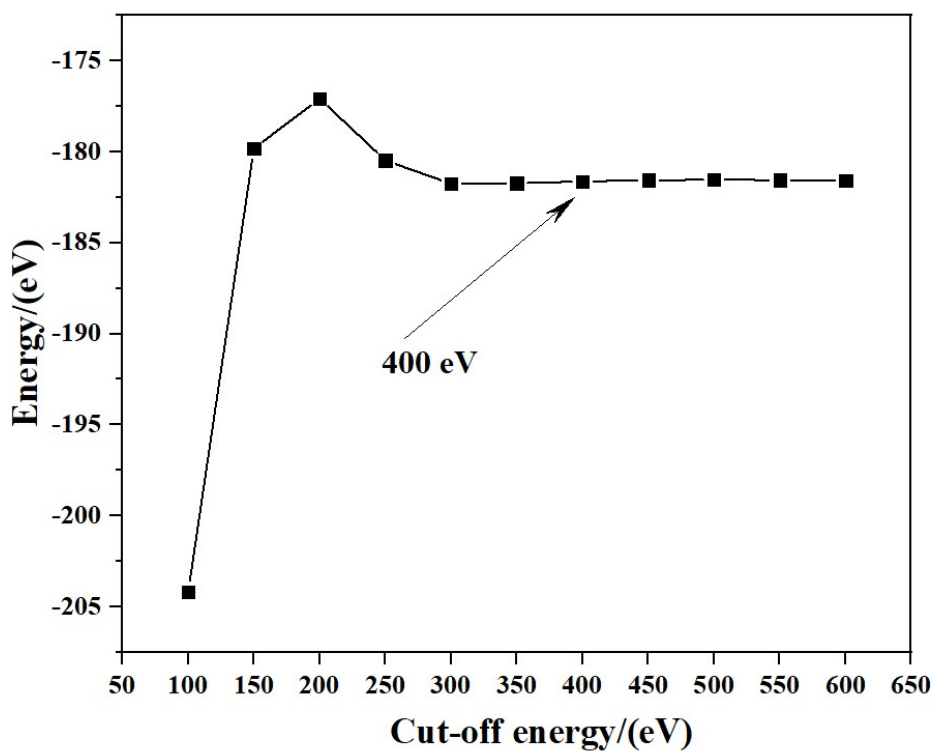

(a)

---

\*Corresponding author: ylsun@cczu.edu.cn; bzzhu@cczu.edu.cn

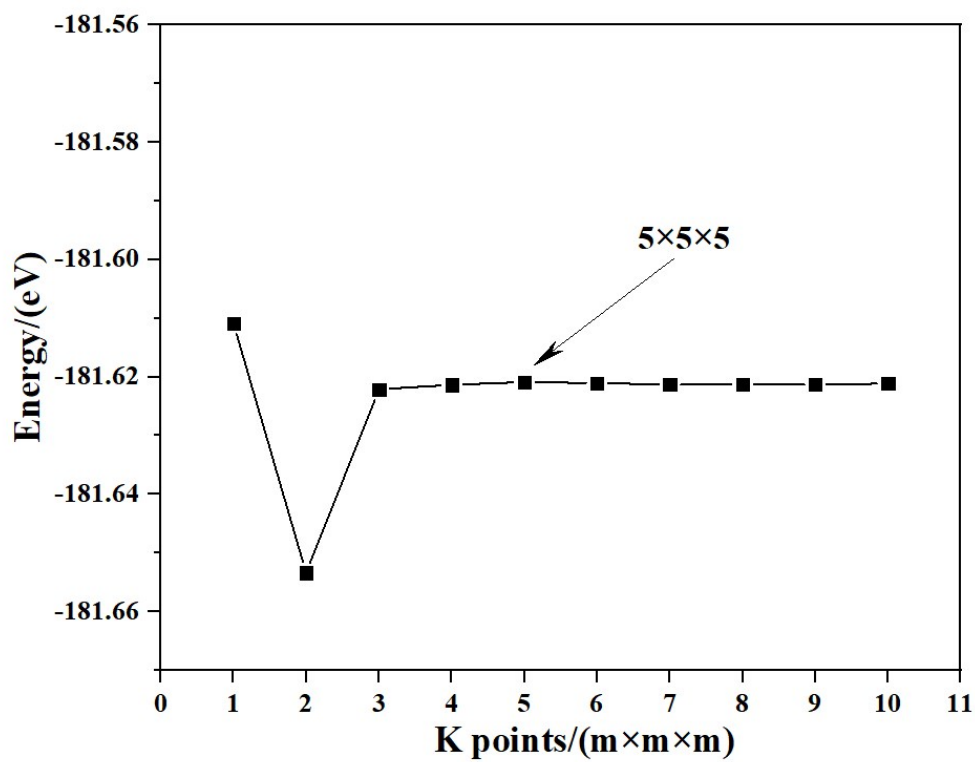

(b)

**Figure S1** Convergence test (a) cut-off energy, (b) K points.

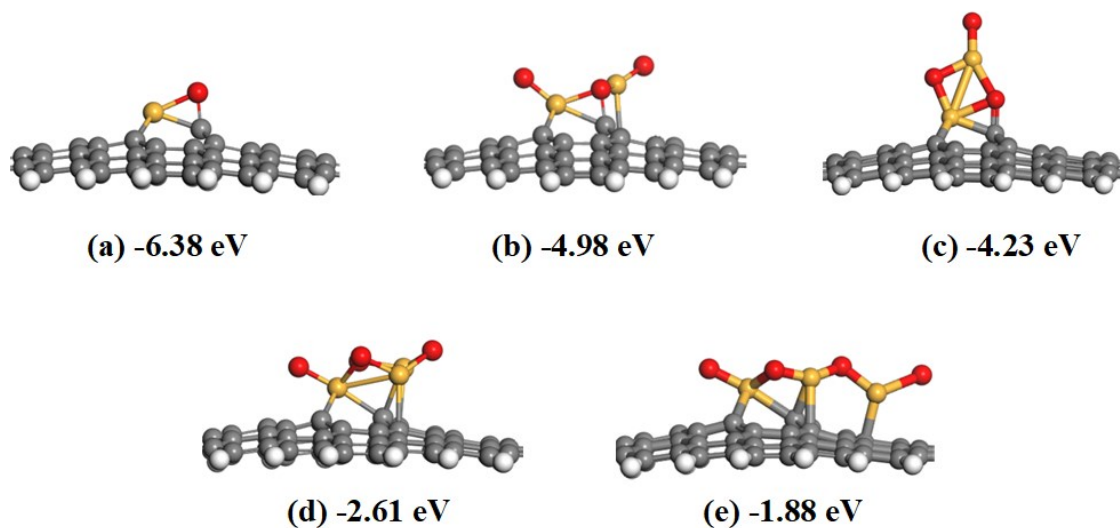

**Figure S2** Configurations of  $\text{Fe}_x\text{O}_y$  clusters loaded on the AC surface (Fe: golden, O: red, C: gray, H: white).

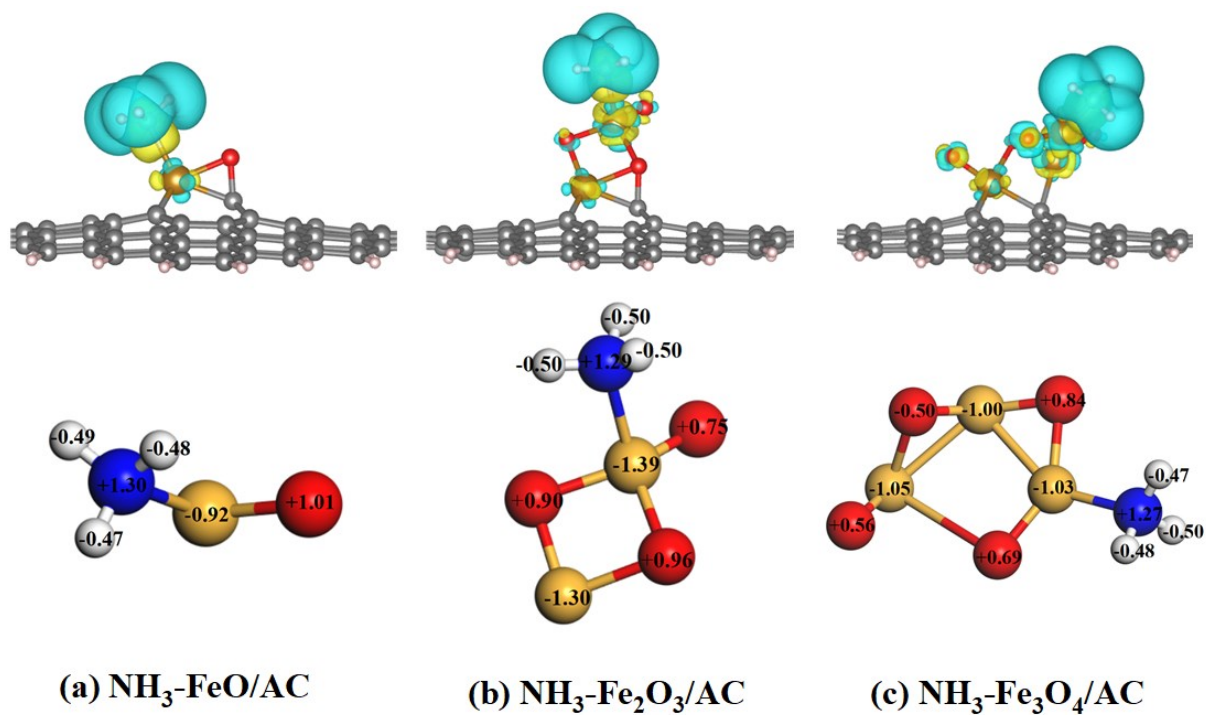

**Figure S3** Electron density difference and Bader charge change of  $\text{NH}_3$  adsorbed on the  $\text{Fe}_x\text{O}_y\text{/AC}$  surface.

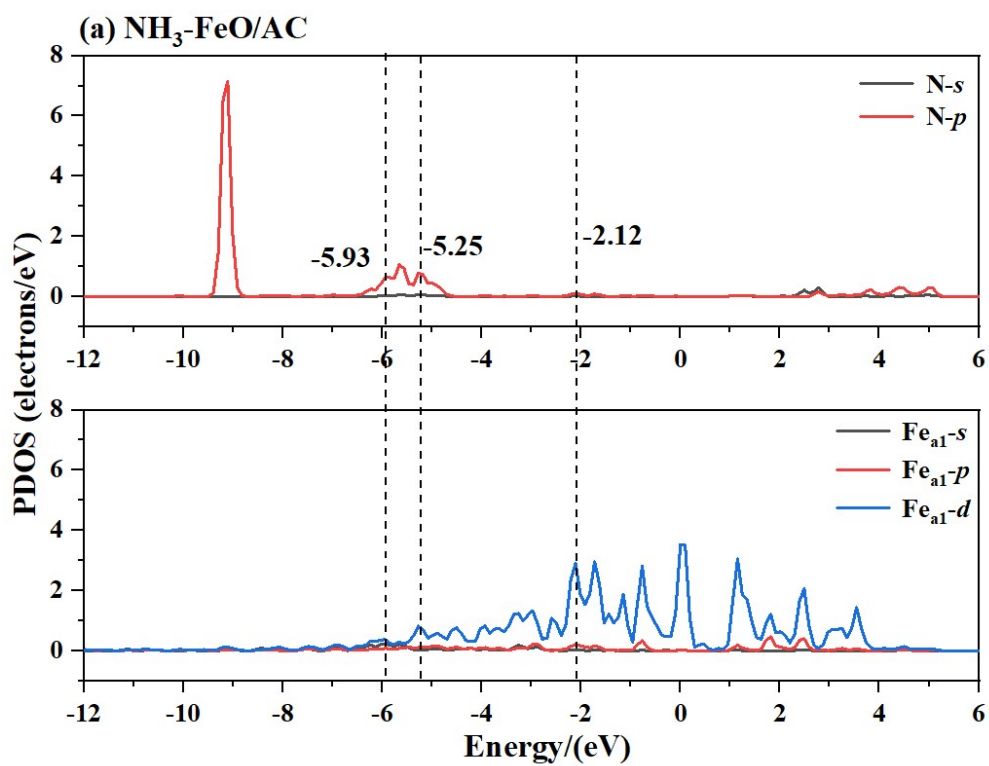

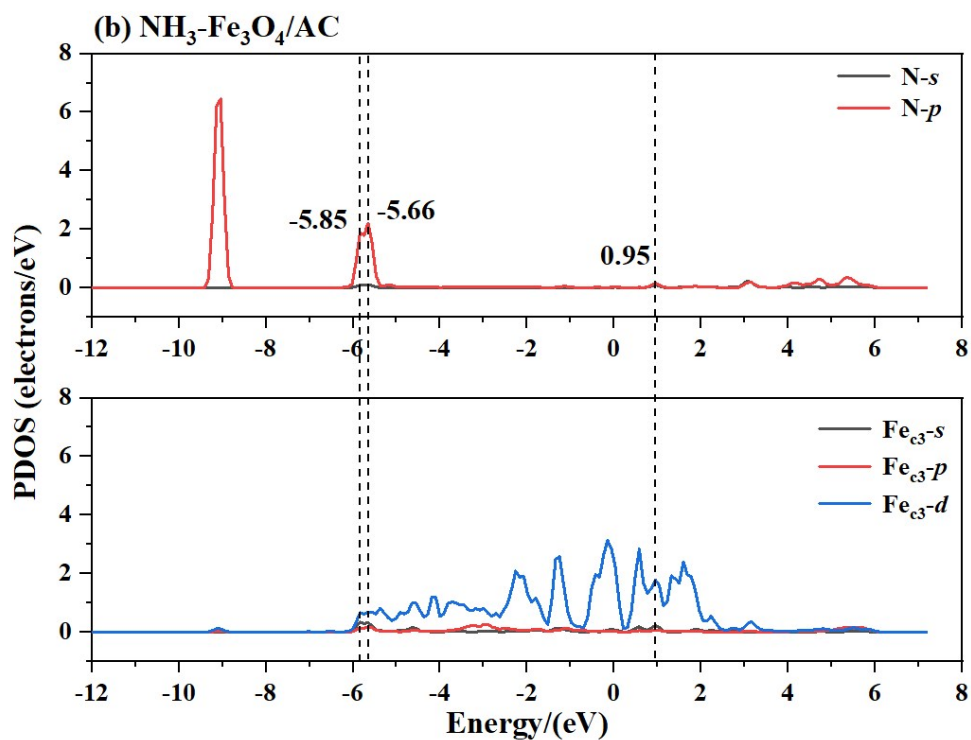

**Figure S4** PDOS results of  $\text{NH}_3$  adsorbed on the  $\text{FeO}/\text{AC}$  and  $\text{Fe}_3\text{O}_4/\text{AC}$  surfaces.

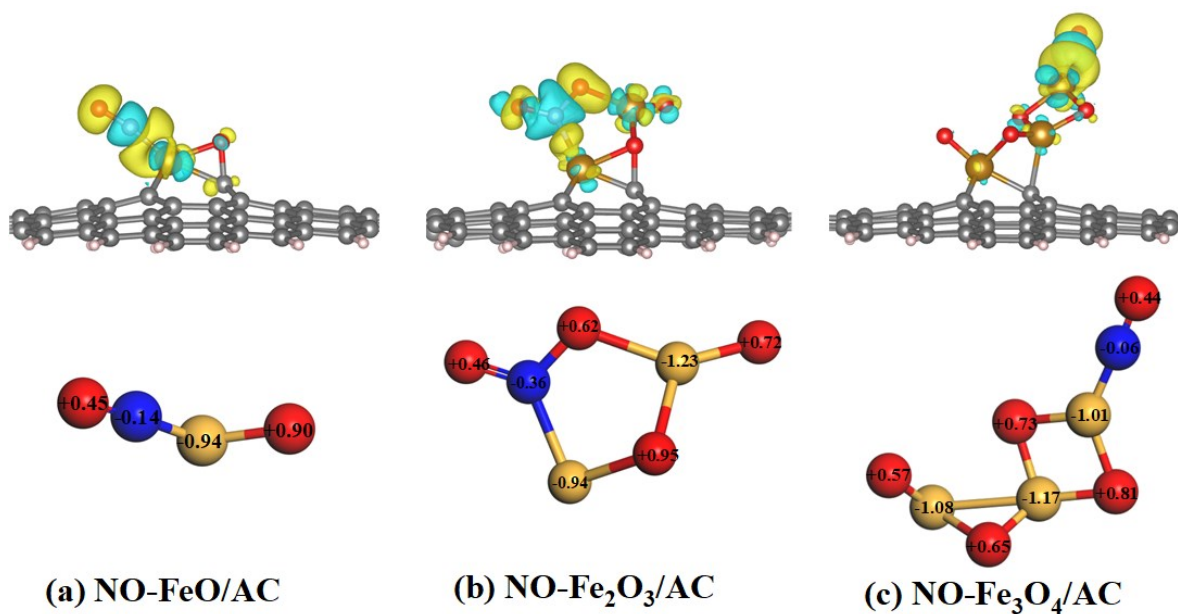

**Figure S5** Electron density difference and Bader charge change of  $\text{NO}$  adsorbed on the  $\text{Fe}_x\text{O}_y/\text{AC}$  surface.

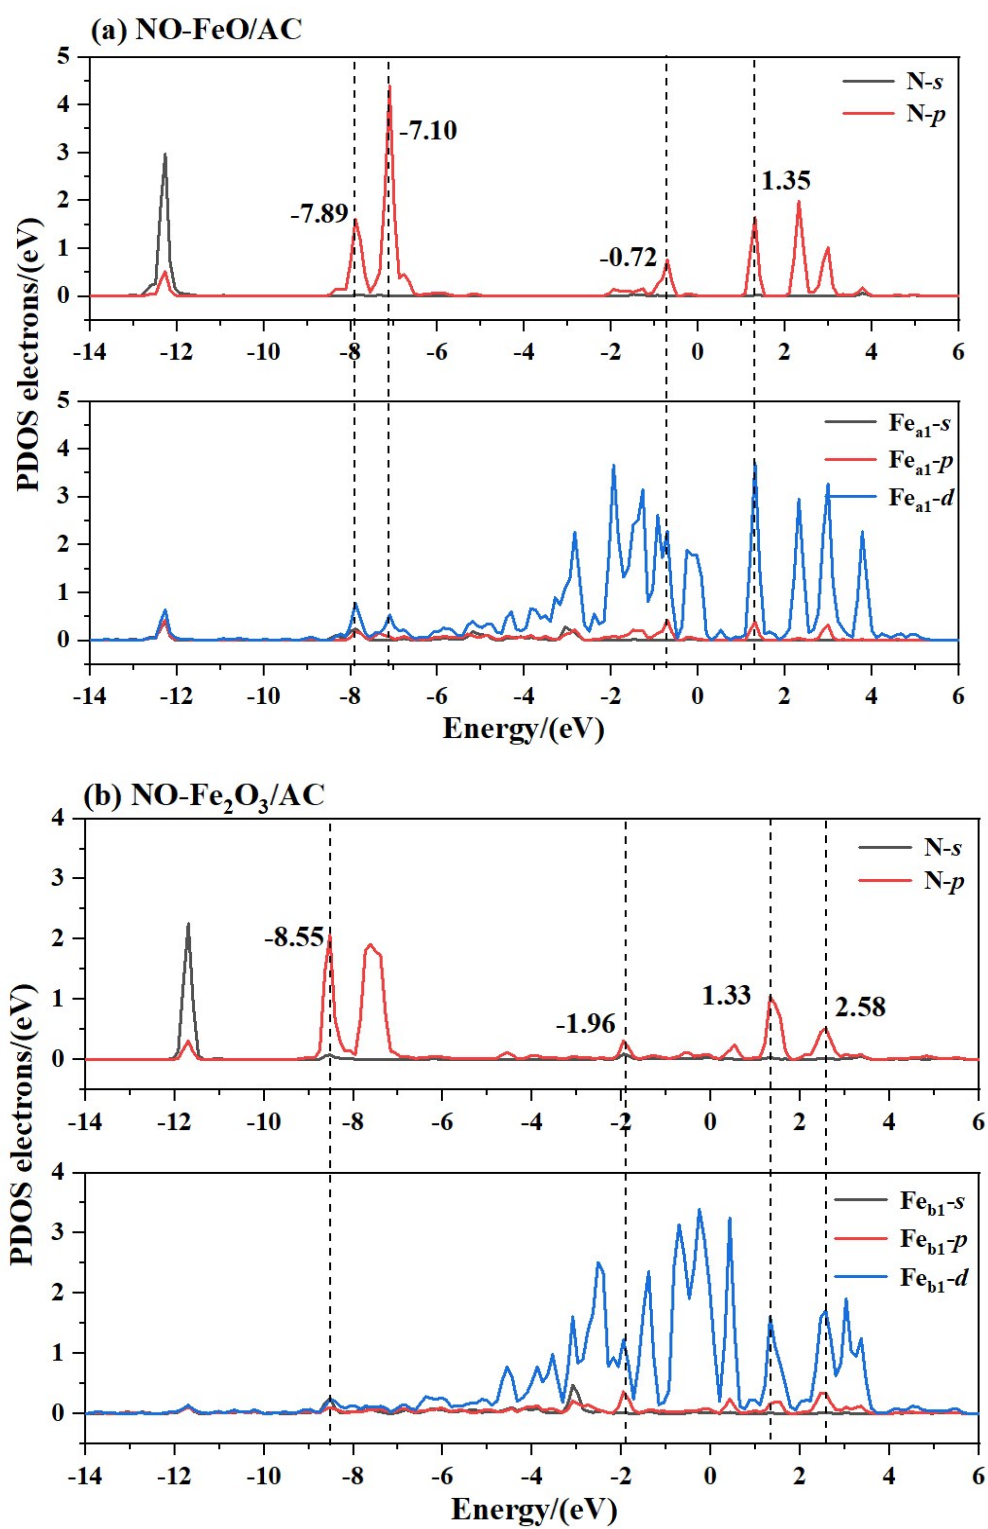

**Figure S6** PDOS results of NO adsorbed on the FeO/AC and Fe<sub>2</sub>O<sub>3</sub>/AC surfaces.

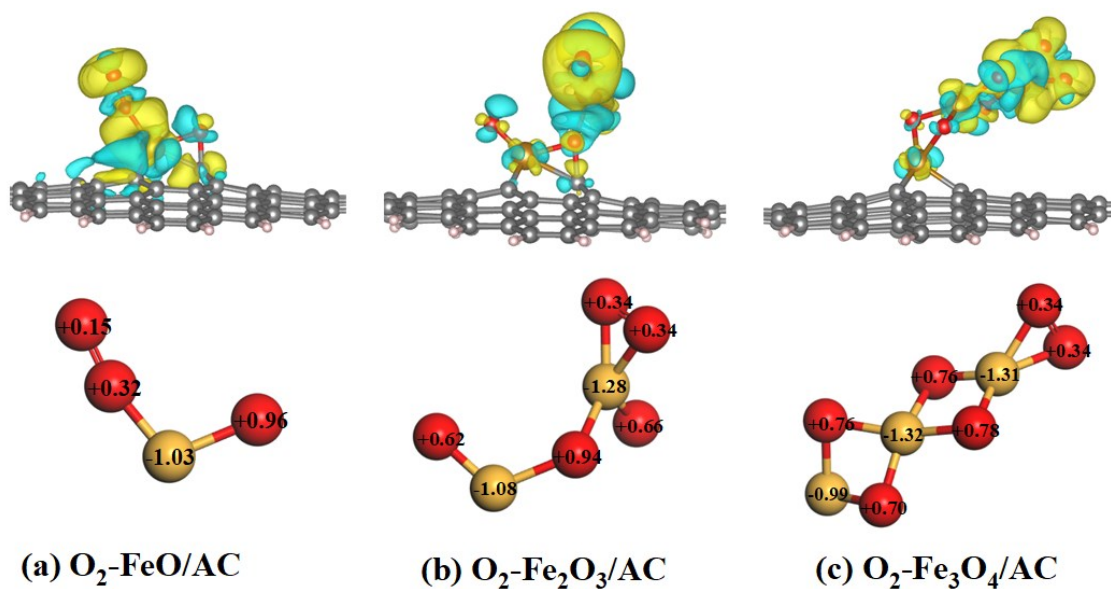

**Figure S7** Electron density difference and Bader charge change of  $\text{O}_2$  adsorbed on the  $\text{Fe}_x\text{O}_y\text{/AC}$  surface.

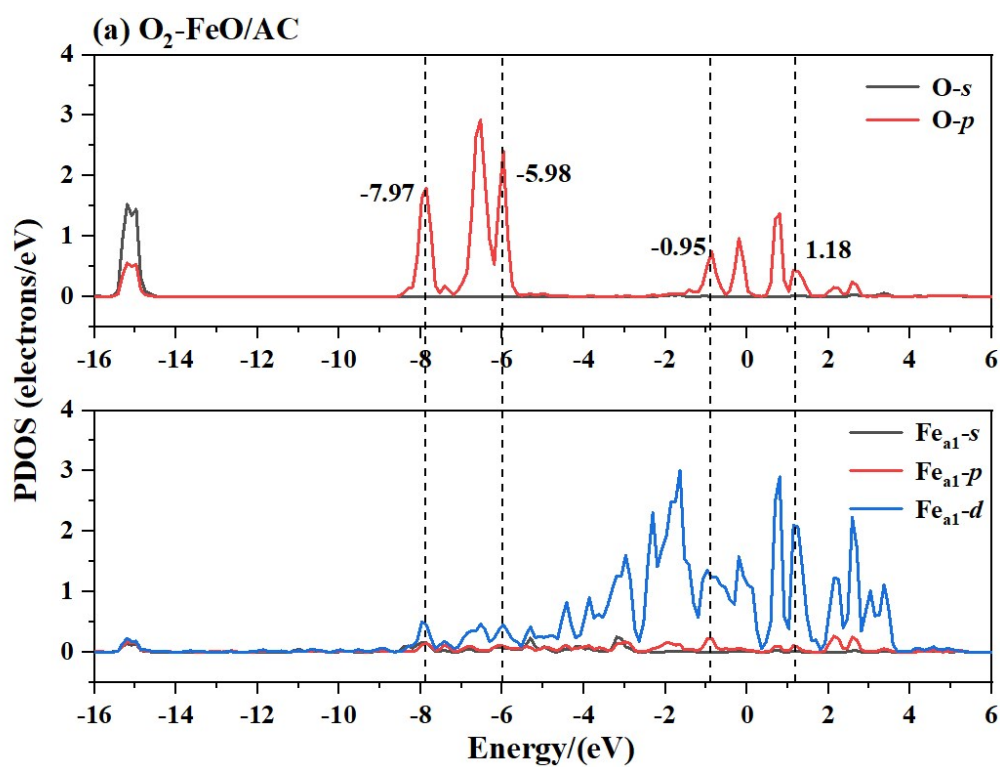

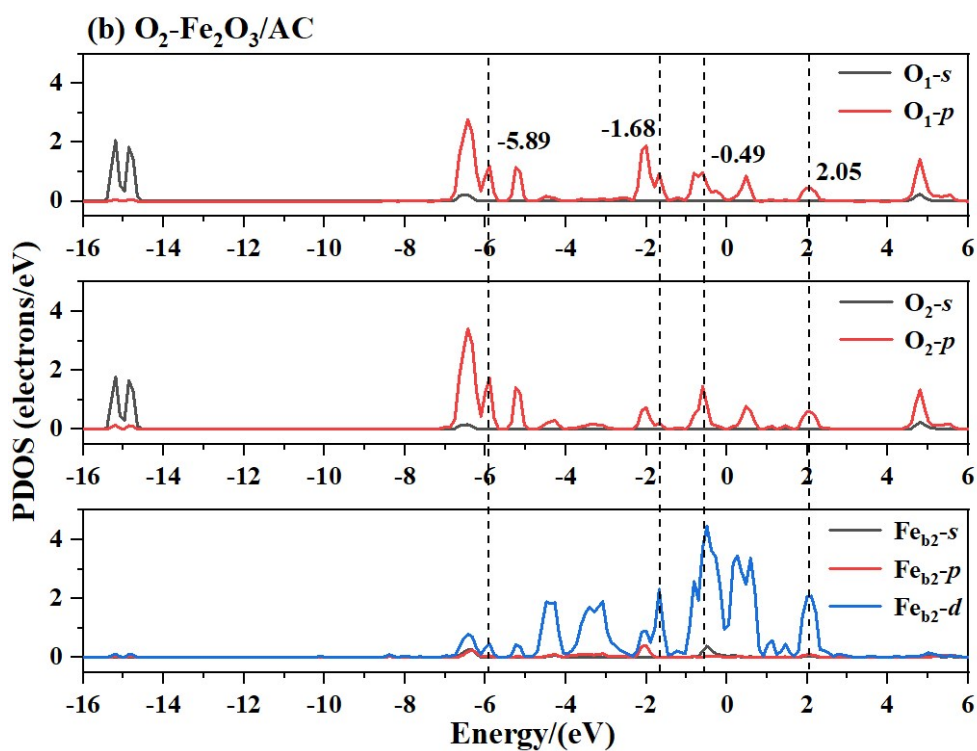

**Figure S8** PDOS results of  $\text{O}_2$  adsorbed on the  $\text{FeO}/\text{AC}$  and  $\text{Fe}_2\text{O}_3/\text{AC}$  surfaces.

**Table S1** Comparison of gas adsorption energies between calculated values and experimental values for the  $\text{Fe}_x\text{O}_y/\text{AC}$  catalyst

| Gas           | $\text{Fe}_x\text{O}_y/\text{AC}$ (eV) | Experimental value (eV) <sup>1</sup> |
|---------------|----------------------------------------|--------------------------------------|
| $\text{NH}_3$ | -2.33                                  | -1.23                                |
| $\text{NO}$   | -3.58                                  | -2.51                                |
| $\text{O}_2$  | -4.99                                  | -2.25                                |

**Table S2** Comparison of adsorption energies between Fe<sub>x</sub>O<sub>y</sub>/AC catalyst and Fe<sub>2</sub>O<sub>3</sub> catalyst.

| Gas             | Fe <sub>x</sub> O <sub>y</sub> /AC (eV) | $\alpha$ -Fe <sub>2</sub> O <sub>3</sub> (eV) <sup>2</sup> | $\gamma$ -Fe <sub>2</sub> O <sub>3</sub> (eV) <sup>3</sup> |
|-----------------|-----------------------------------------|------------------------------------------------------------|------------------------------------------------------------|
| NH <sub>3</sub> | -2.33                                   | -1.20                                                      | -1.69                                                      |
| NO              | -3.58                                   | -1.08                                                      | -2.17                                                      |
| O <sub>2</sub>  | -4.99                                   | -1.28                                                      | -2.01                                                      |

Previous studies<sup>4-6</sup> have shown that the edges of two-dimensional carbon-based materials have the ability to bind to gas molecules or active groups. Hence, we studied the adsorption behaviors of NH<sub>3</sub>, NO, and O<sub>2</sub> on the edge of AC model. The hydrogen-deficient AC surface is shown in Figure S9 and there are two exposed carbon sites (C<sub>1</sub> and C<sub>2</sub>). We can see from the adsorption configurations in Fig. S10b-e that NH<sub>3</sub> and NO molecules can combine with C sites to form N-C bonds, while O<sub>2</sub> cannot bind to them. Table S3 shows that the adsorption energies are -0.59, -1.59, -0.79, and -0.16 eV, and the corresponding electron changes are -0.24, +0.21, +0.25, and -0.01e, respectively. By comparison, it can be found that the adsorption energies of gas molecules on C sites are lower than those of on Fe<sub>x</sub>O<sub>y</sub>/AC surface, suggesting that Fe<sub>x</sub>O<sub>y</sub> clusters loaded on AC surface have more excellent adsorption performance for these gas molecules.

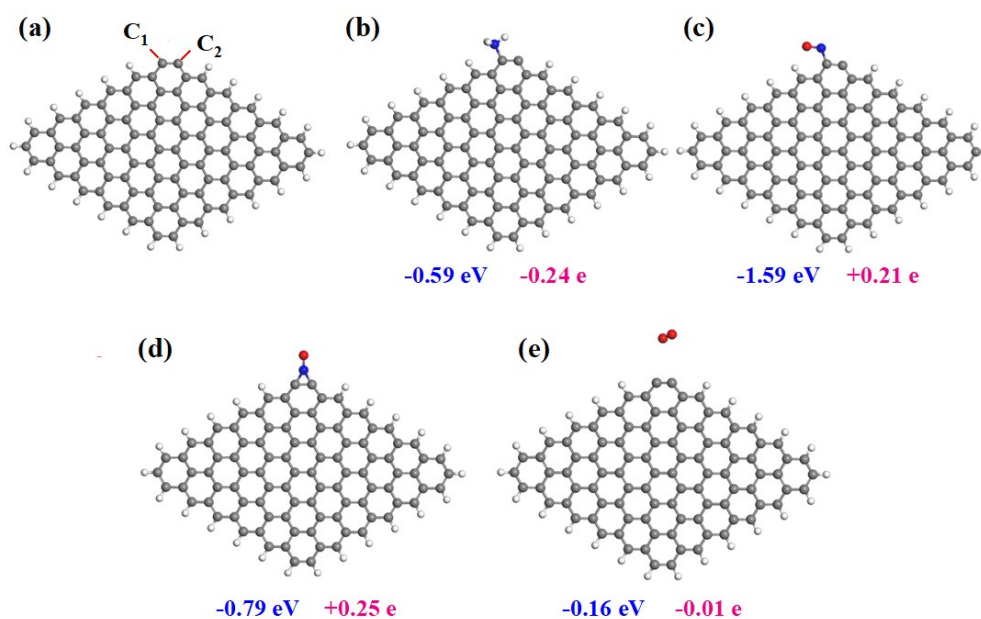

**Figure S9** Gas adsorption configurations on the AC surface.

**Table S3** Adsorption energies and electrons changes of gas molecules on the edge of AC surface.

| Gas             | Adsorption energy (eV) | Electron changes (e) |
|-----------------|------------------------|----------------------|
| NH <sub>3</sub> | -0.59                  | -0.24                |
| NO              | -1.59; -0.79           | +0.21; +0.25         |
| O <sub>2</sub>  | -0.16                  | -0.01                |

- 1 Q. L. Fang, B. Z. Zhu, Y. L. Sun, W. Y. Song, C. Y. Xie, M. G. Xu, Adsorption mechanism of NH<sub>3</sub>, NO, and O<sub>2</sub> molecules over Mn<sub>x</sub>O<sub>y</sub>/Ni (111) surface: a density functional theory study, *J. Mater. Sci.*, 2019, **54**, 14414-14430.
- 2 Q. L. Fang, B. Z. Zhu, Y. L. Sun, Z. C. Zhu, M. G. Xu, T. T. Ge, Mechanistic insight into the selective catalytic reduction of NO by NH<sub>3</sub> over  $\alpha$ -Fe<sub>2</sub>O<sub>3</sub> (001): a density functional theory study, *Catal. Sci. Technol.*, 2019, **9**, 116-124.
- 3 C. Y. Xie, Y. L. Sun, B. Z. Zhu, M. G. Xu, H. L. Yu, E. H. Liu, Density functional theory

study on the reaction mechanism of selective catalytic reduction of NO by NH<sub>3</sub> over the  $\gamma$ -Fe<sub>2</sub>O<sub>3</sub> (001) surface, *Comput. Theor. Chem.*, 2020, **1192**, 113052.

- 4 X. Chen, F. Q. Bai, Y. G. Tang, H. X. Zhang, How the substituents in corannulene and sumanene derivatives alter their molecular assemblings and charge transport properties? —a theoretical study with a dimer model, *J. Comput. Chem.*, 2016, **37**, 813-824.
- 5 E. Kulasekera, S. Petrie, R. Stranger, M. P. Cifuentes, M. G. Humphrey, DFT/TD-DFT analysis of structural, electrochemical and optical data from mononuclear osmium and heterobinuclear osmium–ruthenium alkynyl complexes, *J. Organomet. Chem.*, 2013, **748**, 21-28.
- 6 L. P. Mangin, D. Zargarian, C–H nickellation of phenol-derived phosphinites: regioselectivity and structures of cyclonickellated complexes, *Dalton T.*, 2017, **46**, 16159-16170.
